# Supplementary material
Source: Research Square preprint supplement (doi:10.21203/rs.3.rs-9569564/v1)
Supplement: Supplementary file 2 [file 3ec17681e1249348c9aa8b1e.pdf]

| Working conditions-related statements                                           | Total* (n=135)<br>n (% , 95% CI) |                |                | Nurses (n=60)<br>n (% , 95% CI) |                |                | Physicians (n=62)<br>n (% , 95% CI) |                |                | Effect<br>size<br>(0-1) | p-<br>value<br>(adj) |
|---------------------------------------------------------------------------------|----------------------------------|----------------|----------------|---------------------------------|----------------|----------------|-------------------------------------|----------------|----------------|-------------------------|----------------------|
|                                                                                 | Disagree                         | Neutral        | Agree          | Disagree                        | Neutral        | Agree          | Disagree                            | Neutral        | Agree          |                         |                      |
| Vaccination choice caused division within the team.                             | 91 (67, 59-75)                   | 22 (16, 11-24) | 22 (16, 11-24) | 36 (60, 47-72)                  | 11 (18, 10-30) | 13 (22, 12-34) | 48 (77, 65-87)                      | 8 (13, 6-24)   | 6 (10, 4-20)   | 0.20                    | 0.30                 |
| I felt unsafe due to a shortage of specific PPE (e.g., FFP2 masks).             | 74 (55, 46-63)                   | 22 (16, 11-24) | 39 (29, 21-37) | 31 (52, 38-65)                  | 10 (17, 8-29)  | 19 (32, 20-45) | 38 (61, 48-73)                      | 9 (14, 7-26)   | 15 (24, 14-37) | 0.10                    | 0.67                 |
| I felt unsafe due to unclear effectiveness of available PPE.                    | 73 (54, 45-63)                   | 26 (19, 13-27) | 36 (27, 19-35) | 34 (57, 43-69)                  | 8 (13, 6-25)   | 18 (30, 19-43) | 34 (55, 42-68)                      | 14 (23, 13-35) | 14 (23, 13-35) | 0.13                    | 0.46                 |
| I felt my safety was not the organization's top priority.                       | 72 (53, 45-62)                   | 28 (21, 14-29) | 35 (26, 19-34) | 30 (50, 37-63)                  | 13 (22, 12-34) | 17 (28, 17-41) | 35 (56, 43-69)                      | 13 (21, 12-33) | 14 (23, 13-35) | 0.07                    | 0.71                 |
| I found the visitor restriction policy difficult.                               | 28 (21, 14-29)                   | 37 (27, 20-36) | 70 (52, 43-61) | 7 (12, 5-23)                    | 10 (17, 8-29)  | 43 (72, 59-83) | 20 (32, 21-45)                      | 21 (34, 22-47) | 21 (34, 22-47) | 0.38                    | <0.01                |
| I felt strong workplace pressure to work extra hours.                           | 56 (41, 33-50)                   | 32 (24, 17-32) | 47 (35, 27-43) | 24 (40, 28-53)                  | 11 (18, 10-30) | 25 (42, 29-55) | 27 (44, 31-57)                      | 17 (27, 17-40) | 18 (29, 18-42) | 0.15                    | 0.45                 |
| I had sufficient control over where, how, and with whom I worked.               | 54 (40, 32-49)                   | 41 (30, 23-39) | 40 (30, 22-38) | 32 (53, 40-66)                  | 13 (22, 12-34) | 15 (25, 15-38) | 17 (27, 17-40)                      | 22 (36, 24-49) | 23 (37, 25-50) | 0.26                    | 0.06                 |
| Constantly changing safety guidelines negatively affected my sense of security. | 52 (39, 30-47)                   | 31 (23, 16-31) | 52 (39, 30-47) | 22 (37, 25-50)                  | 12 (20, 11-32) | 26 (43, 31-57) | 27 (44, 31-57)                      | 17 (27, 17-40) | 18 (29, 18-42) | 0.15                    | 0.45                 |

**Table 2. Working conditions in direct patient care during COVID-19.** Values are presented as n (%; 95% confidence interval). Statistical comparisons between nurses and physicians were conducted using Fisher's exact test. Adjusted p-values (adj) were corrected using the Benjamini-Hochberg procedure. All p-values are two-sided. Effect size ranges from 0 to 1. PPE = personal protective equipment. Total includes all respondents working in direct patient care, comprising nurses, physicians, and other clinical staff.
