# Supplementary material
Source: Research Square preprint supplement (doi:10.21203/rs.3.rs-9569564/v1)
Supplement: Supplementary file 3 [file 773426b772867bddce0aa360.pdf]

| Characteristics                     | Interviews             | Survey                 |                           |                         |
|-------------------------------------|------------------------|------------------------|---------------------------|-------------------------|
|                                     | Nurses (n=17)<br>n (%) | Nurses (n=60)<br>n (%) | Physician (n=62)<br>n (%) | Total* (n=135)<br>n (%) |
| <i>Age (years)</i>                  |                        |                        |                           |                         |
| Mean (SD)                           | 53 (15)                | 45 (13)                | 47 (9)                    | 46 (11)                 |
| Median (IQR)                        | 60 (17)                | 45 (21)                | 44 (14)                   | 45 (18)                 |
| Range                               | 25-67                  | 24-68                  | 33-67                     | 24-68                   |
| <i>Gender</i>                       |                        |                        |                           |                         |
| Female                              | 15 (88)                | 52 (87)                | 32 (52)                   | 94 (70)                 |
| Male                                | 2 (12)                 | 8 (13)                 | 30 (48)                   | 41 (30)                 |
| <i>Relationship Status</i>          |                        |                        |                           |                         |
| Married                             | 10 (59)                | 25 (42)                | 34 (55)                   | 64 (47)                 |
| Cohabiting                          | 3 (18)                 | 16 (27)                | 14 (23)                   | 33 (24)                 |
| Long-distance relationship          | 0                      | 9 (15)                 | 5 (8)                     | 16 (12)                 |
| Single/No relationship              | 4 (24)                 | 10 (17)                | 7 (11)                    | 20 (15)                 |
| Other                               | 0                      | 0                      | 2 (3)                     | 2 (2)                   |
| <i>Children Living at Home</i>      |                        |                        |                           |                         |
| 1 child living at home              | 4 (24)                 | 12 (20)                | 10 (16)                   | 25 (19)                 |
| 2 children living at home           | 4 (24)                 | 15 (25)                | 17 (27)                   | 35 (26)                 |
| 3 or more children living at home   | 0                      | 2 (3)                  | 11 (18)                   | 13 (10)                 |
| None                                | 9 (53)                 | 31 (52)                | 24 (39)                   | 62 (46)                 |
| <i>Ethnicity</i>                    |                        |                        |                           |                         |
| Dutch                               | 17 (100)               | 56 (93)                | 55 (89)                   | 123 (91)                |
| Non-Dutch                           | 0                      | 4 (7)                  | 7 (11)                    | 12 (9)                  |
| <i>Department</i>                   |                        |                        |                           |                         |
| Acute & Intensive Care <sup>a</sup> | 7 (42)                 | 25 (42)                | 29 (47)                   | 59 (44)                 |
| General Hospital Care <sup>b</sup>  | 5 (29)                 | 18 (30)                | 31 (50)                   | 53 (40)                 |
| Other                               | 5 (29)                 | 17 (28)                | 2 (3)                     | 23 (17)                 |
| <i>COVID-19 Unit Employment</i>     |                        |                        |                           |                         |
| Yes                                 | 11 (65)                |                        |                           |                         |
| No                                  | 6 (35)                 |                        |                           |                         |
| <i>Working experience (years)</i>   |                        |                        |                           |                         |
| Mean (SD)                           | 29 (13)                | 21 (12)                | 18 (10)                   | 20 (11)                 |
| Median (IQR)                        | 29 (19)                | 19 (19)                | 16 (11)                   | 18 (17)                 |
| Range                               | 5-43                   | 3-49                   | 2-46                      | 2-49                    |

**Table 1. Demographic and professional characteristics of interview and survey participants.** Values are presented as n (%) unless otherwise indicated. Age and working experience are presented as mean (SD), median (IQR), and range. \*Total includes all respondents working in direct patient care, comprising nurses, physicians, and other clinical staff. <sup>a</sup>Acute & Intensive Care includes Emergency

Department, Intensive Care, and Anesthesiology. <sup>b</sup>General Hospital Care includes Internal Medicine, Cardiology, Surgery, Pulmonology, Gastroenterology, Neurology, Oncology, and Radiology.
