# Supplementary material
Source: Research Square preprint supplement (doi:10.21203/rs.3.rs-9569564/v1)
Supplement: Supplementary file 4 [file 7957174a634fff770ddd71ab.pdf]

| Factor                               | Total* (n=135)<br>n(%) | Nurses (n=60)<br>n(%) | Physicians (n=62)<br>n(%) | OR (95% CI)       | p-value<br>(adj) |
|--------------------------------------|------------------------|-----------------------|---------------------------|-------------------|------------------|
| <b><u>Negative influences</u></b>    |                        |                       |                           |                   |                  |
| Fear of infection (self/loved ones)  | 48 (36)                | 18 (30)               | 22 (36)                   | 1.32 (0.65-2.73)  | 0.82             |
| Uncertainty about pandemic duration  | 47 (35)                | 23 (38)               | 19 (31)                   | 0.85 (0.42-1.71)  | 1.00             |
| Restrictions on recreation/leisure   | 47 (35)                | 19 (32)               | 23 (37)                   | 1.31 (0.65-2.66)  | 0.82             |
| Absence of patient visits            | 45 (33)                | 26 (43)               | 17 (27)                   | 0.65 (0.32-1.31)  | 0.82             |
| Social isolation from measures       | 40 (30)                | 17 (28)               | 20 (32)                   | 1.27 (0.61-2.67)  | 0.90             |
| Dealing with COVID deniers           | 34 (25)                | 16 (27)               | 15 (24)                   | 0.98 (0.44-2.20)  | 1.00             |
| Increased workload/long shifts       | 27 (20)                | 17 (28)               | 7 (11)                    | 0.41 (0.14-1.07)  | 0.82             |
| Work/life balance difficulties       | 27 (20)                | 14 (23)               | 12 (19)                   | 0.89 (0.37-2.15)  | 1.00             |
| Uncertainty about PPE effectiveness  | 23 (17)                | 11 (18)               | 10 (16)                   | 0.95 (0.35-2.54)  | 1.00             |
| Lack of autonomy at work             | 15 (11)                | 5 (8.33)              | 8 (13)                    | 1.71 (0.48-6.78)  | 0.82             |
| Unclear organizational communication | 12 (9)                 | 6 (10.0)              | 6 (10)                    | 1.05 (0.28-4.02)  | 1.00             |
| Insufficient societal support        | 10 (7)                 | 3 (5.0)               | 7 (11)                    | 2.51 (0.56-15.26) | 0.82             |
| Lack of personal patient contact     | 9 (7)                  | 3 (5.0)               | 5 (8)                     | 1.77 (0.34-11.57) | 0.82             |
| Insufficient mental support          | 7 (5)                  | 5 (8.33)              | 1 (2)                     | 0.21 (0.00-1.87)  | 0.82             |
| Other                                | 10 (7)                 | 3 (5.0)               | 5 (8)                     | 1.77 (0.34-11.57) | 0.82             |
| <b><u>Positive influences</u></b>    |                        |                       |                           |                   |                  |

|                                           |         |         |         |                    |      |
|-------------------------------------------|---------|---------|---------|--------------------|------|
| Pride in work accomplished                | 71 (53) | 29 (48) | 35 (57) | 1.14 (0.64-2.05)   | 1.00 |
| Team support and camaraderie              | 52 (39) | 31 (52) | 16 (26) | 0.43 (0.21-0.85)   | 0.18 |
| Family time at home                       | 42 (31) | 18 (30) | 23 (37) | 1.21 (0.60-2.47)   | 1.00 |
| Exercise                                  | 38 (28) | 15 (25) | 20 (32) | 1.26 (0.59-2.75)   | 1.00 |
| Societal recognition                      | 35 (26) | 13 (22) | 20 (32) | 1.47 (0.67-3.34)   | 1.00 |
| Evening rest and relaxation               | 33 (24) | 13 (22) | 18 (29) | 1.31 (0.59-3.01)   | 1.00 |
| Reduced social obligations                | 32 (24) | 14 (23) | 15 (24) | 0.99 (0.43-2.29)   | 1.00 |
| Recognition from colleagues/family        | 31 (23) | 13 (22) | 12 (19) | 0.84 (0.34-2.07)   | 1.00 |
| Social contacts outside work              | 23 (17) | 10 (17) | 11 (18) | 1.02 (0.38-2.75)   | 1.00 |
| Organizational gestures (meals/gifts)     | 16 (12) | 10 (17) | 4 (7)   | 0.36 (0.08-1.27)   | 0.76 |
| Financial bonuses                         | 8 (6)   | 5 (8)   | 3 (5)   | 0.55 (0.08-2.87)   | 1.00 |
| Hobbies                                   | 7 (5)   | 1 (2)   | 5 (8.)  | 4.71 (0.52-224.59) | 1.00 |
| Clear communication from management       | 3 (2)   | 1 (2)   | 1 (2)   | 0.93 (0.01-73.00)  | 1.00 |
| Hospital's mental health support offering | 1 (1)   | 0 (0)   | 1 (2)   | Inf (0.02-Inf)     | 1.00 |
| Other                                     | 5 (4)   | 1 (2)   | 4 (7)   | 3.75 (0.37-186.10) | 1.00 |

**Table 5. Negative and positive influences on well-being during COVID-19.** Values are presented as n (%). Statistical comparisons between nurses and physicians were conducted using Fisher's exact test, with odds ratios (ORs) and 95% confidence intervals. Adjusted p-values were corrected using the

Benjamini-Hochberg procedure. All p-values are two-sided. \*Total includes all respondents working in direct patient care, comprising nurses, physicians, and other clinical staff.
