# Supplementary material
Source: Research Square preprint supplement (doi:10.21203/rs.3.rs-9569564/v1)
Supplement: Supplementary file 5 [file ae002831a9bbeec9c70f9f45.pdf]

| Support-related statements                                                      | Total* (n=135)<br>n (% , 95% CI) |                |                | Nurses (n=60)<br>n (% , 95% CI) |                |                | Physicians (n=62)<br>n (% , 95% CI) |                |                | Effect size<br>(0-1) | p-value<br>(adj) |
|---------------------------------------------------------------------------------|----------------------------------|----------------|----------------|---------------------------------|----------------|----------------|-------------------------------------|----------------|----------------|----------------------|------------------|
|                                                                                 | Disagree                         | Neutral        | Agree          | Disagree                        | Neutral        | Agree          | Disagree                            | Neutral        | Agree          |                      |                  |
| I regularly felt undervalued and underestimated at work.                        | 99 (73, 65-81)                   | 16 (12, 7-19)  | 20 (15, 9-22)  | 40 (67, 53-78)                  | 11 (18, 10-30) | 9 (15, 7-27)   | 49 (79, 67-88)                      | 4 (6, 2-16)    | 9 (14, 7-26)   | 0.18                 | 0.28             |
| Communication about departmental measures was sufficient.                       | 14 (10, 6-17)                    | 24 (18, 12-25) | 97 (72, 63-79) | 10 (17, 8-29)                   | 7 (12, 5-23)   | 43 (72, 59-83) | 3 (5, 1-14)                         | 14 (23, 13-35) | 45 (73, 60-83) | 0.22                 | 0.15             |
| During the pandemic, I received most support from direct colleagues.            | 12 (9, 5-15)                     | 37 (27, 20-36) | 86 (64, 55-72) | 5 (8, 3-18)                     | 12 (20, 11-32) | 43 (72, 59-83) | 6 (10, 4-20)                        | 20 (32, 21-45) | 36 (58, 45-70) | 0.15                 | 0.39             |
| Psychological support from the hospital should be voluntary, not mandatory.     | 16 (12, 7-19)                    | 36 (27, 19-35) | 83 (61, 53-70) | 8 (13, 6-25)                    | 13 (22, 12-34) | 39 (65, 52-77) | 8 (13, 6-24)                        | 20 (32, 21-45) | 34 (55, 42-68) | 0.12                 | 0.53             |
| I felt societal appreciation for my profession; it made me feel valued.         | 25 (19, 12-26)                   | 30 (22, 16-30) | 80 (59, 50-68) | 12 (20, 11-32)                  | 13 (22, 12-34) | 35 (58, 45-71) | 11 (18, 9-30)                       | 11 (18, 9-30)  | 40 (64, 51-76) | 0.06                 | 0.81             |
| My workplace was understanding when I indicated work was overwhelming.          | 24 (18, 12-25)                   | 75 (56, 47-64) | 36 (27, 19-35) | 15 (25, 15-38)                  | 32 (53, 40-66) | 13 (22, 12-34) | 5 (8, 3-18)                         | 36 (58, 45-70) | 21 (34, 22-47) | 0.24                 | 0.13             |
| The organization provided sufficient psychological support AFTER the pandemic.  | 40 (30, 22-38)                   | 67 (50, 41-58) | 28 (21, 14-29) | 20 (33, 22-47)                  | 27 (45, 32-58) | 13 (22, 12-34) | 16 (26, 16-38)                      | 32 (52, 39-64) | 14 (23, 15-35) | 0.08                 | 0.75             |
| The organization provided sufficient psychological support DURING the pandemic. | 20 (15, 9-22)                    | 62 (46, 37-55) | 53 (39, 31-48) | 12 (20, 11-32)                  | 27 (45, 32-58) | 21 (35, 23-48) | 6 (10, 4-20)                        | 28 (45, 32-58) | 28 (45, 32-58) | 0.16                 | 0.39             |
| My salary was proportional to the work I delivered during the pandemic.         | 59 (44, 35-53)                   | 27 (20, 14-28) | 49 (36, 28-45) | 36 (60, 47-72)                  | 11 (18, 10-30) | 13 (22, 12-34) | 17 (27, 17-40)                      | 12 (19, 10-31) | 33 (53, 40-66) | 0.36                 | <0.01            |

**Table 3. Support experiences in direct patient care during COVID-19.** Values are presented as n (%; 95% confidence interval). Statistical comparisons between nurses and physicians were conducted using Fisher's exact test. Adjusted p-values were corrected using the Benjamini-Hochberg procedure. All p-values are two-sided. Effect size ranges from 0 to 1. Total includes all respondents working in direct patient care, comprising nurses, physicians, and other clinical staff.
