# Supplementary material
Source: Research Square preprint supplement (doi:10.21203/rs.3.rs-9569564/v1)
Supplement: Supplementary file 7 [file ed0dfceae425230fdb98794e.pdf]

| Resilience-related statements                                                  | Total* (n=135) |                |                 | Nurses (n=60)  |                |                | Physicians (n=62) |                |                | Effect size (0-1) | p-value (adj) |
|--------------------------------------------------------------------------------|----------------|----------------|-----------------|----------------|----------------|----------------|-------------------|----------------|----------------|-------------------|---------------|
|                                                                                | n (% , 95% CI) |                |                 | n (% , 95% CI) |                |                | n (% , 95% CI)    |                |                |                   |               |
|                                                                                | Disagree       | Neutral        | Agree           | Disagree       | Neutral        | Agree          | Disagree          | Neutral        | Agree          |                   |               |
| I appreciated going to work rather than staying home all day                   | 6 (4, 2-9)     | 9 (7, 3-12)    | 120 (89, 82-94) | 4 (7, 2-16)    | 5 (8, 3-18)    | 51 (85, 73-93) | 2 (3, 0-11)       | 4 (6, 2-16)    | 56 (90, 80-96) | 0.09              | 0.78          |
| I look back with pride on the work we did during the pandemic                  | 3 (2, 0-6)     | 29 (21, 15-29) | 103 (76, 68-83) | 2 (3, 0-12)    | 12 (20, 11-32) | 46 (77, 64-87) | 1 (2, 0-9)        | 13 (21, 12-33) | 48 (77, 65-87) | 0.06              | 1.00          |
| I had more responsibility than I could handle                                  | 91 (67, 59-75) | 23 (17, 11-24) | 21 (16, 10-23)  | 31 (52, 38-65) | 12 (20, 11-32) | 17 (28, 17-41) | 52 (84, 72-92)    | 7 (11, 5-22)   | 3 (5, 1-14)    | 0.37              | <0.01         |
| I found satisfaction in supporting patients during their most critical moments | 3 (2, 0-6)     | 46 (34, 26-43) | 86 (64, 55-72)  | 3 (5, 1-14)    | 17 (28, 17-41) | 40 (67, 53-78) | 0 (0, 0-6)        | 21 (34, 22-47) | 41 (66, 53-78) | 0.17              | 0.36          |
| I felt overwhelmed at work during the pandemic                                 | 86 (64, 55-72) | 28 (21, 14-29) | 21 (16, 10-23)  | 33 (55, 42-68) | 12 (20, 11-32) | 15 (25, 15-38) | 44 (71, 58-82)    | 13 (21, 12-33) | 5 (8, 3-18)    | 0.23              | 0.22          |
| Working during a crisis gave me extra professional satisfaction                | 19 (14, 9-21)  | 35 (26, 19-34) | 81 (60, 51-68)  | 11 (18, 10-30) | 15 (25, 15-38) | 34 (57, 43-69) | 5 (8, 3-18)       | 14 (23, 13-35) | 43 (69, 56-80) | 0.17              | 0.36          |
| It was difficult dealing with COVID deniers in the hospital                    | 26 (19, 13-27) | 36 (27, 19-35) | 73 (54, 45-63)  | 8 (13, 6-25)   | 17 (28, 17-41) | 35 (58, 45-71) | 16 (26, 16-38)    | 17 (27, 17-40) | 29 (47, 34-60) | 0.16              | 0.36          |
| It was difficult seeing how sick patients were and the death toll              | 27 (20, 14-28) | 36 (27, 19-35) | 72 (53, 45-62)  | 9 (15, 7-27)   | 17 (28, 17-41) | 34 (57, 43-69) | 17 (27, 17-40)    | 13 (21, 12-33) | 32 (52, 39-64) | 0.16              | 0.36          |
| I could not provide the quality of care I wanted to give                       | 40 (30, 22-38) | 24 (18, 12-25) | 71 (53, 44-61)  | 14 (23, 13-36) | 10 (17, 8-29)  | 36 (60, 47-72) | 23 (37, 25-50)    | 11 (18, 9-30)  | 28 (45, 32-58) | 0.16              | 0.36          |

| Resilience-related statements                                         | Total* (n=135) |                |                | Nurses (n=60)  |                |                | Physicians (n=62) |                |                | Effect size (0-1) | p-value (adj) |
|-----------------------------------------------------------------------|----------------|----------------|----------------|----------------|----------------|----------------|-------------------|----------------|----------------|-------------------|---------------|
|                                                                       | n (% , 95% CI) |                |                | n (% , 95% CI) |                |                | n (% , 95% CI)    |                |                |                   |               |
|                                                                       | Disagree       | Neutral        | Agree          | Disagree       | Neutral        | Agree          | Disagree          | Neutral        | Agree          |                   |               |
| I experienced fear of becoming ill or infecting loved ones            | 34 (25, 18-33) | 31 (23, 16-31) | 70 (52, 43-61) | 15 (25, 15-38) | 14 (23, 13-36) | 31 (52, 38-65) | 16 (26, 16-38)    | 14 (23, 13-35) | 32 (52, 39-64) | 0.01              | 1.00          |
| Lack of social activities negatively affected my well-being           | 57 (42, 34-51) | 27 (20, 14-28) | 51 (38, 30-47) | 25 (42, 29-55) | 9 (15, 7-27)   | 26 (43, 31-57) | 29 (47, 34-60)    | 12 (19, 10-31) | 21 (34, 22-47) | 0.10              | 0.78          |
| Insufficient inquiry into my needs and well-being during the pandemic | 49 (36, 28-45) | 40 (30, 22-38) | 46 (34, 26-43) | 18 (30, 19-43) | 18 (30, 19-43) | 24 (40, 28-53) | 30 (48, 36-61)    | 15 (24, 14-37) | 17 (27, 17-40) | 0.19              | 0.36          |

**Table 4. Resilience in direct patient care: comparison between nurses and physicians.** Statistical comparisons were conducted between nurses and physicians using Fisher's exact test. Adjusted (adj) p-values were Benjamini-Hochberg-corrected; all p-values are two-sided. \*Total includes all respondents working in direct patient care, comprising nurses, physicians, and a small number of other clinical staff.
